# Supplementary material
Source: Springer Nature journal article supplement (http://www.springermedizin.de/resource/supplementary/13075_2010_9695_MOESM3_ESM.pdf/9693554)

# Pain

SMD, 95% CI

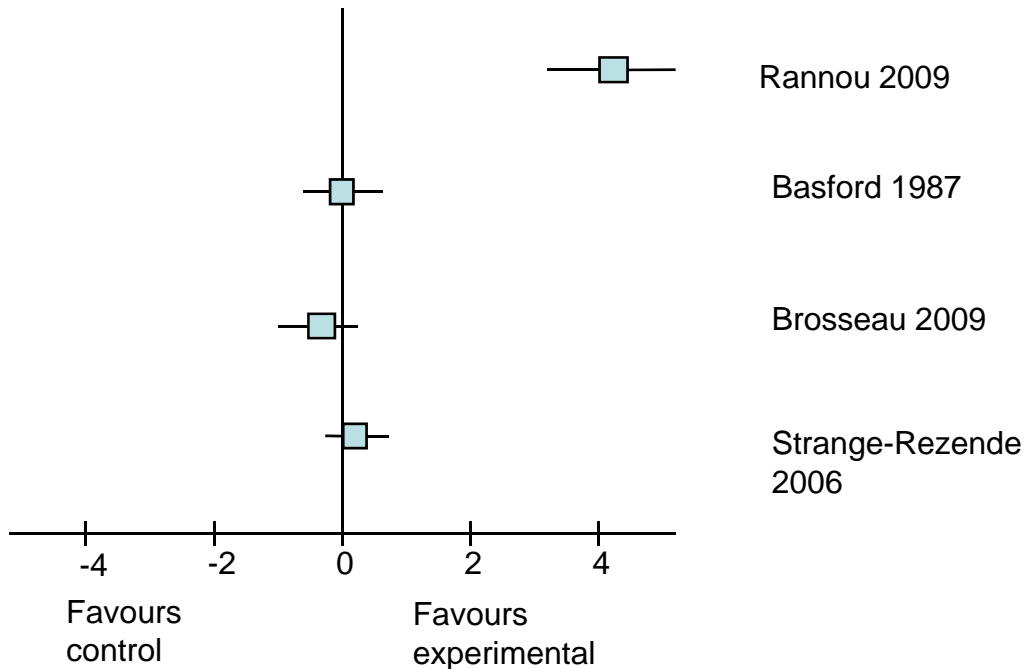

Supplement: MOESM3 [file 9693554]
